# Supplementary material
Source: PubMed Central journal article supplement (PMC9467290)
Supplement: NIHMS1795419-supplement-supplementary.pdf [file NIHMS1795419-supplement-supplementary.pdf]

Supplementary Materials for

**Laser Direct Write of Heteroatom-Doped Graphene on  
Molecularly Controlled Polyimides for Electrochemical  
Biosensors with Nanomolar Sensitivity**

*Ki-Ho Nam, Moataz Abdulhafez, Elisa Castagnola, Golnaz Najaf Tomaraei,  
Xinyan Tracy Cui, Mostafa Bedewy\**

Corresponding author. E-mail: [mbedewy@pitt.edu](mailto:mbedewy@pitt.edu)

## Supplementary Figures

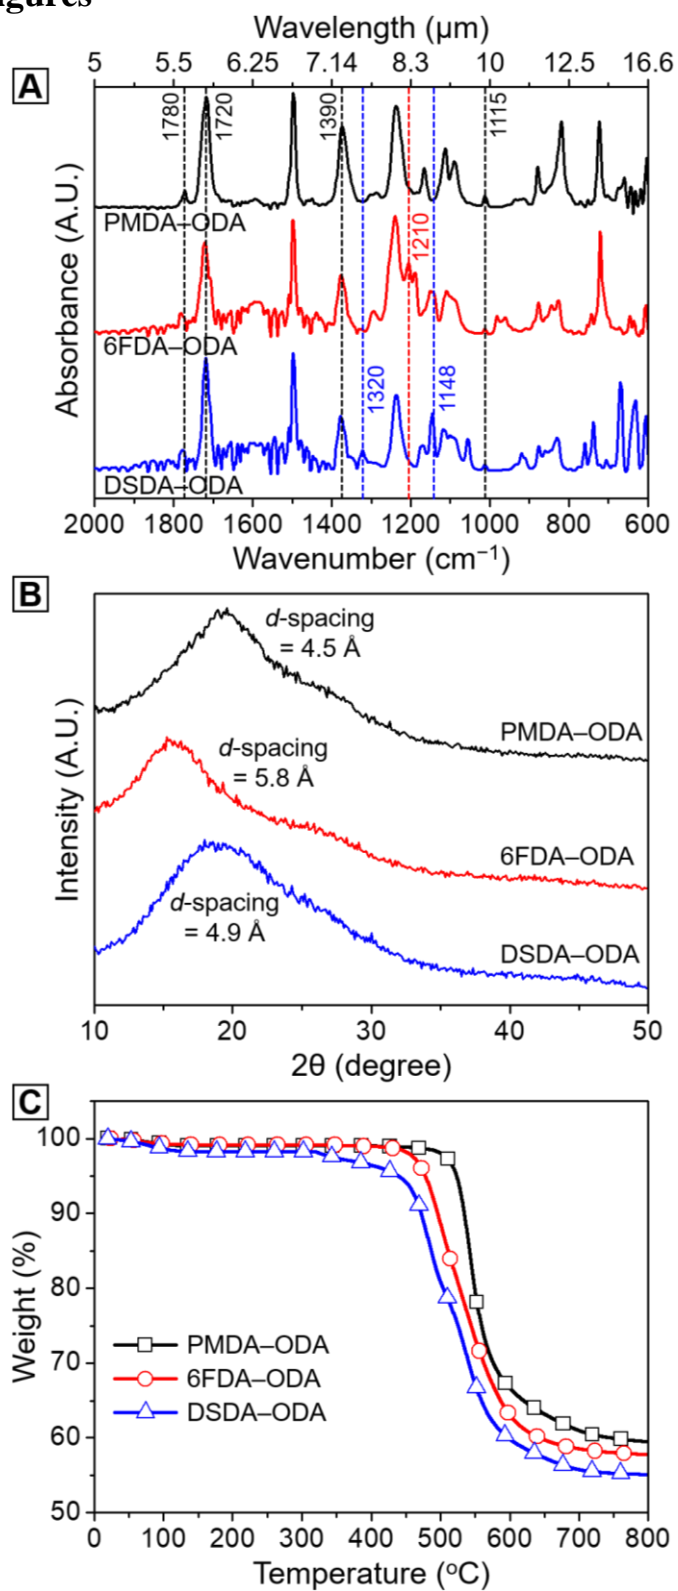

**Fig. S1.** (a) FTIR absorption spectra, (b) XRD patterns, and (c) TGA thermograms of PIs.

The FTIR absorption spectra of three PIs were combined in Fig. S1(a). All the PIs showed characteristic absorption peaks at  $1780\text{ cm}^{-1}$ ,  $1720\text{ cm}^{-1}$ , and  $1390\text{ cm}^{-1}$  corresponding to the asymmetric C=O stretching, symmetric C=O stretching, and C–N stretching, respectively.[1] No absorption peak appearing round  $1650\text{ cm}^{-1}$  indicated that PAA was completely converted to PI during the thermal dehydration. The absorption peak at  $1210\text{ cm}^{-1}$  was assigned to the C–F stretching in 6FDA–ODA,[2] while the absorption peaks appearing at  $1320\text{ cm}^{-1}$  and  $1148\text{ cm}^{-1}$  are assigned to the C–(SO<sub>2</sub>)–C stretching and S=O stretching vibrations in DSDA–ODA.[3]

The average interchain spacing (*d*-spacing) was calculated from the most prominent XRD peak in the glassy amorphous PI spectra. From Fig. S1(b), it was observed that all the PI films presented amorphous phase. The chain packing density and intermolecular interaction of PIs with the same diamine was shown in the decreasing order of PMDA–ODA > DSDA–ODA > 6FDA–ODA. It can be explained that the 6FDA tetracarboxylic dianhydride owned bulky spatial structures, which disrupted the chain packing and reduced the polymer–polymer interaction.

The effect of molecular building blocks on the thermal degradation behavior of three PIs was evaluated using the original TGA thermograms (Fig. S1(c)). The temperatures at 5% weight loss ( $T_{d5\%}$ ) of the PI films in nitrogen atmosphere were recorded in the range of 439–523 °C and were found to gradually increase in the order of DSDA–ODA < 6FDA–ODA < PMDA–ODA. Furthermore, carbonized residues at 800 °C were in the range of 55–59%. PMDA with relatively ordered, linear, and rigid-rod-like backbone structure showed a higher thermal stability than with the present of sulfone and bulky trifluoromethyl groups.

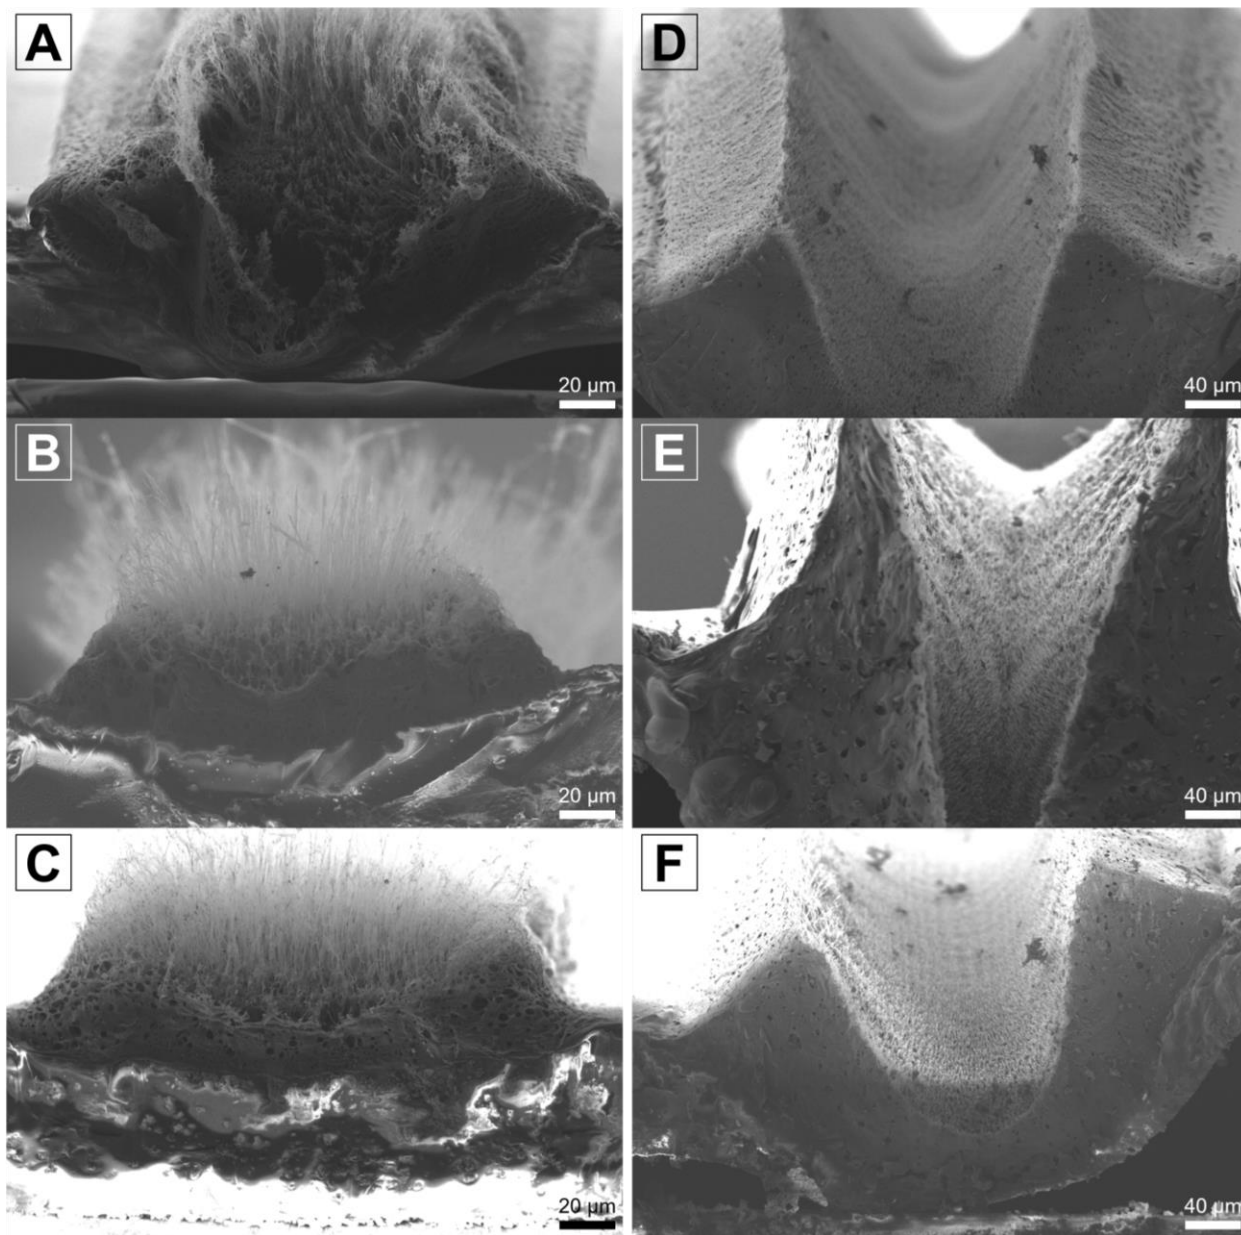

**Fig. S2.** Cross-sectional SEM images of carbon line features fabricated at  $P = 12.5$  W,  $S = 500$  mm s<sup>-1</sup> (laser fluence = 16 J cm<sup>-2</sup>): (a) N-LINC, (b) F-LINC, and (c) S-LINC. Cross-sectional SEM images of carbon line features fabricated at  $P = 12.5$  W,  $S = 47$  mm s<sup>-1</sup> (laser fluence = 170 J cm<sup>-2</sup>): (d) N-LINC, (e) F-LINC, and (f) S-LINC.

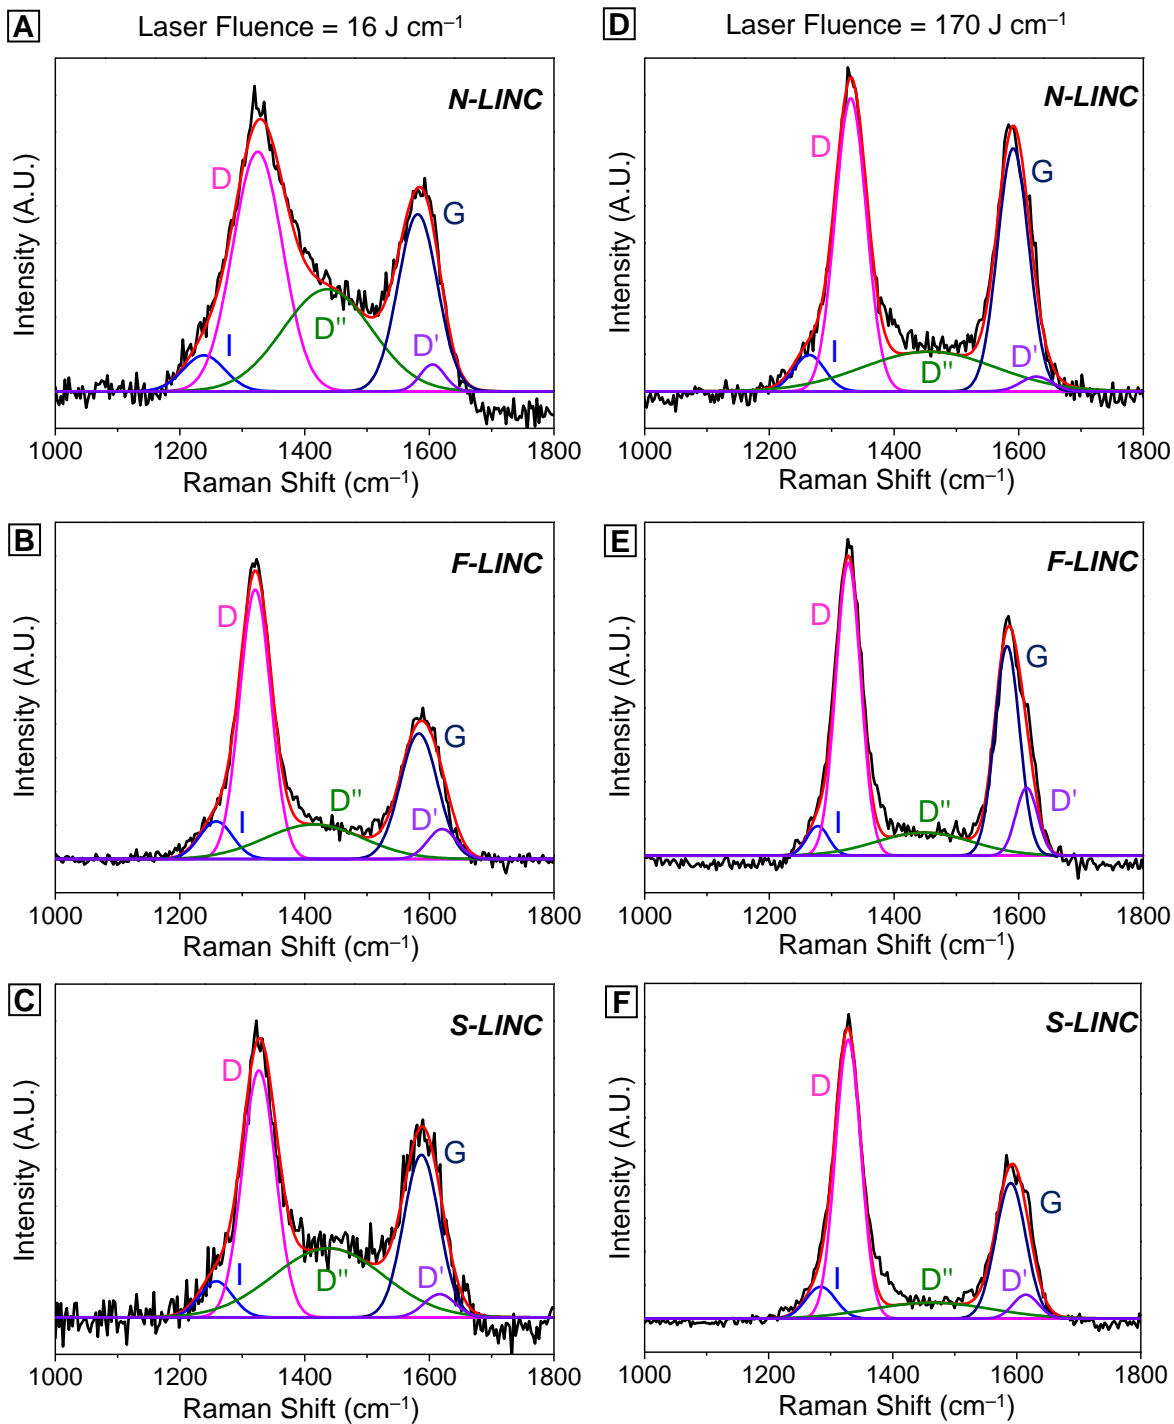

**Fig. S3.** Raman spectra and the deconvolution based on five Lorentzian peaks corresponding to the following bands: G, I, D, D', D''. Results obtained at laser fluence of  $16 \text{ J cm}^{-2}$  are presented for N-LINC in (A), F-LINC in (B), and S-LINC in (C). Results obtained at laser fluence of  $170 \text{ J cm}^{-2}$  are presented for N-LINC in (D), F-LINC in (E), and S-LINC in (F).

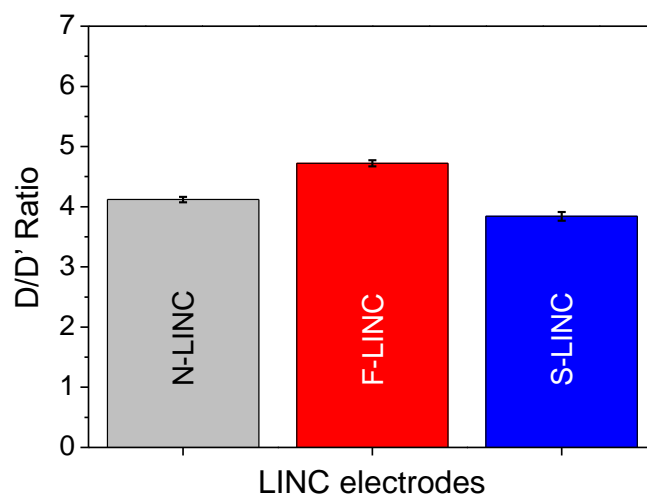

**Fig. S4.** The D/D' ratio of the three different LINC electrodes obtained at laser fluence of  $170 \text{ J cm}^{-2}$ .

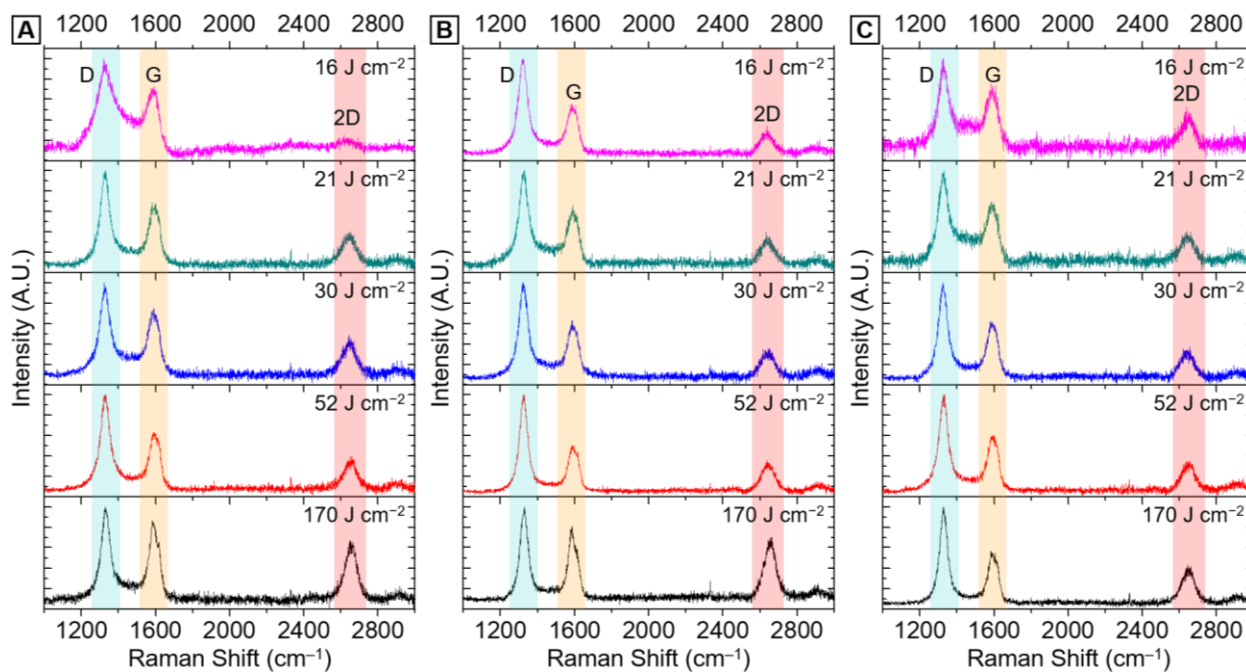

**Fig. S5.** Laser fluence dependent Raman spectra of carbon lines formed from (a) PMDA-ODA, (b) 6FDA-ODA, and (c) DSDA-ODA.

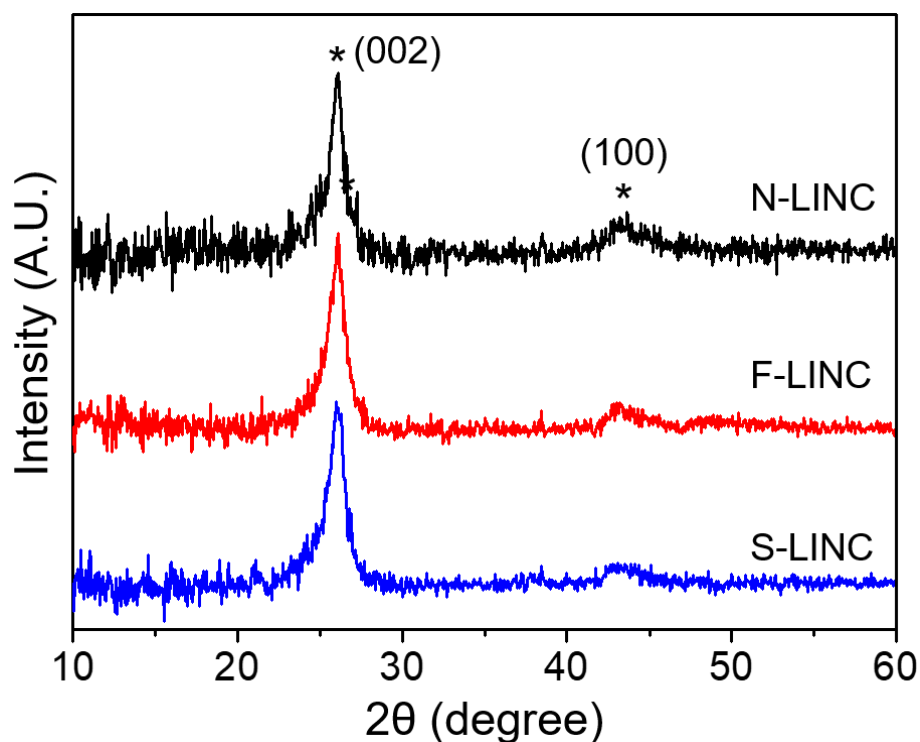

**Fig. S6.** XRD patterns of powdered N-LINC, F-LINC, and S-LINC scraped from the PI films. These samples were fabricated at fluence of  $170 \text{ J}\cdot\text{cm}^{-2}$ .

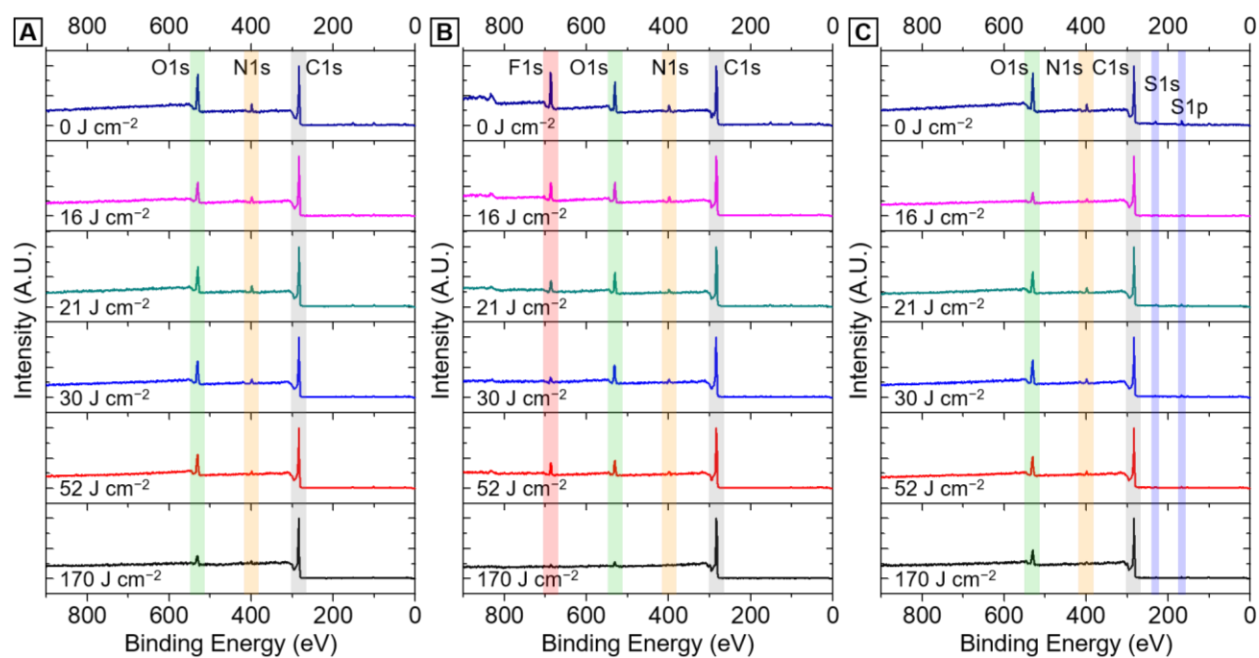

**Fig. S7.** Laser fluence dependent XPS survey spectra of carbon lines formed from (a) PMDA-ODA, (b) 6FDA-ODA, and (c) DSDA-ODA.

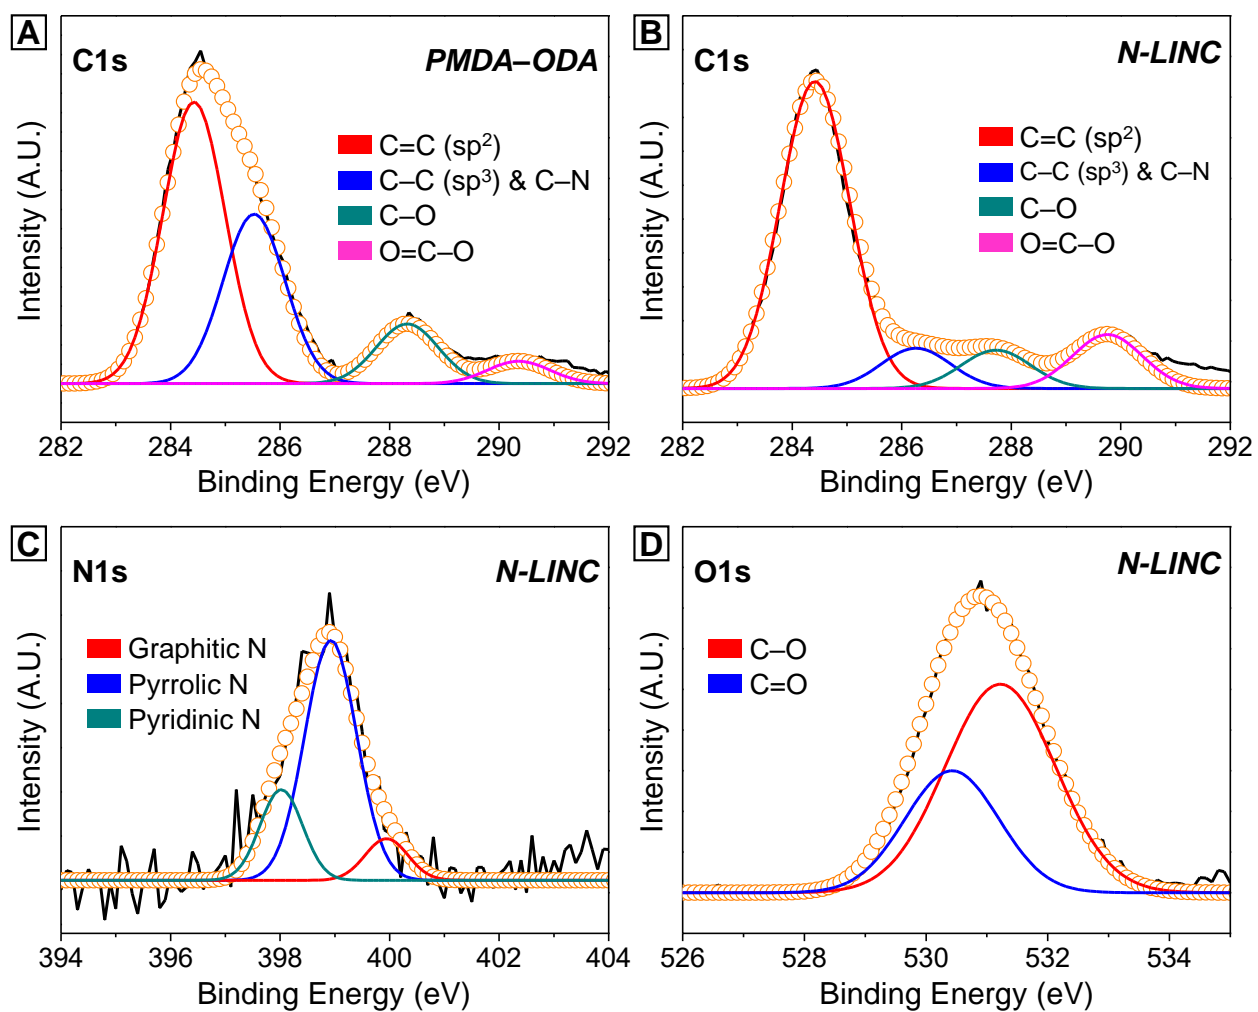

**Fig. S8.** N-LINC formed from PMDA-ODA at a laser fluence of  $52 \text{ J cm}^{-2}$  ( $P = 12.5 \text{ W}$ ,  $S = 153 \text{ mm s}^{-1}$ ). Deconvoluted (a–b) C1s XPS spectra of PMDA-ODA and N-LINC. High resolution (c) N1s and (d) O1s XPS spectra of N-LINC.



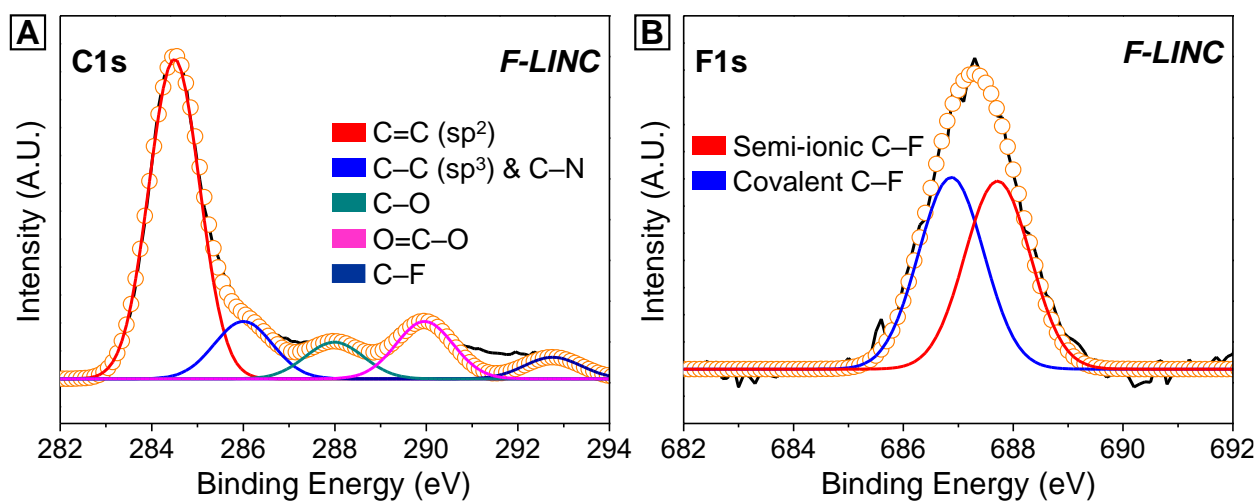

**Fig. S9.** F-LINC formed from 6FDA-ODA at a laser fluence of  $52 \text{ J cm}^{-2}$  ( $P = 12.5 \text{ W}$ ,  $S = 153 \text{ mm s}^{-1}$ ). Deconvoluted (a) C1s and (b) high resolution F1s XPS spectra of F-LINC.

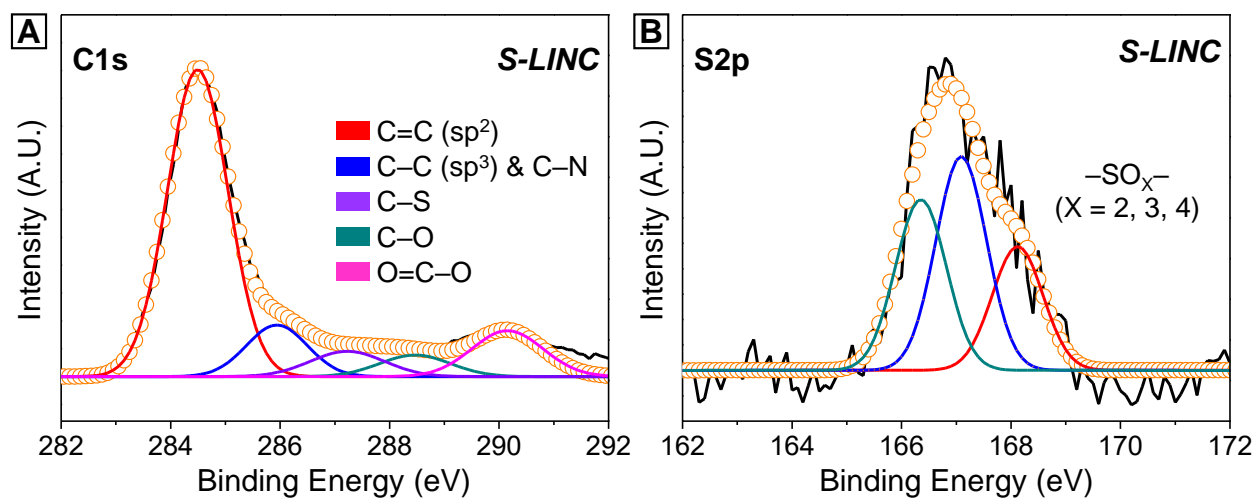

**Fig. S10.** S-LINC formed from DSDA-ODA at a laser fluence of  $52 \text{ J cm}^{-2}$  ( $P = 12.5 \text{ W}$ ,  $S = 153 \text{ mm s}^{-1}$ ). Deconvoluted (a) C1s and (b) high resolution S2p XPS spectra of S-LINC.

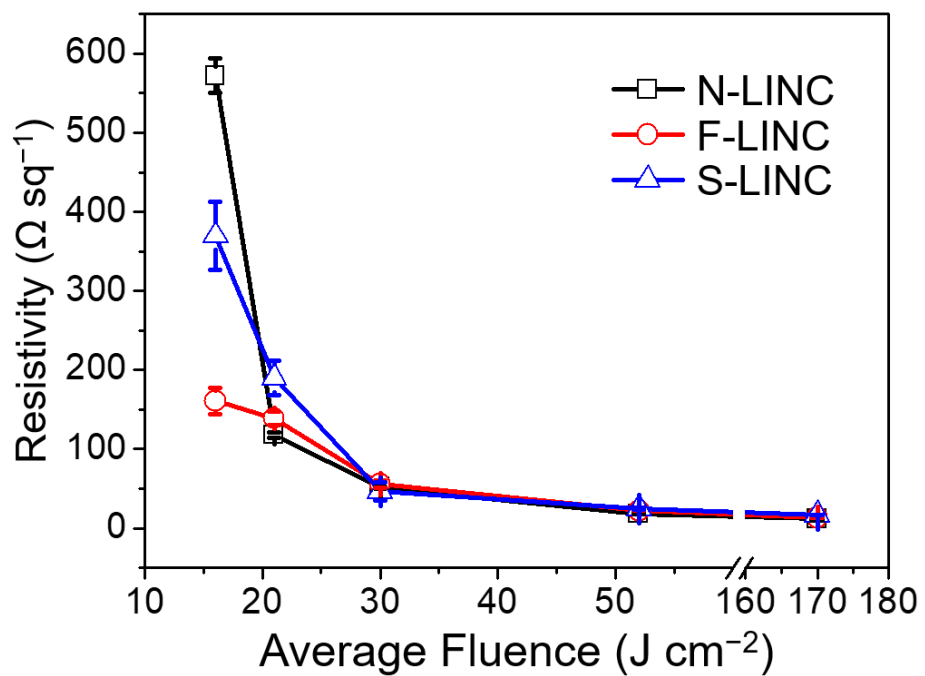

**Fig. S11.** Variation of resistivity of N-LINC (black line), F-LINC (red line), and S-LINC (blue line) with laser fluence.

## Supplementary Notes

The beam is modeled as an elliptical Gaussian beam. The beam intensity is modeled using the following relationship.[4,5]

$$I(x, y, z) = I_o e^{-2\left(\frac{x}{w_x(z)}\right)^2} e^{-2\left(\frac{y}{w_y(z)}\right)^2} \left[ \frac{W}{m^2} \right] \quad (1)$$

where  $x$  and  $y$  are measured from beam center axis at distance  $z$  from the beam waist. Beam dimensions are  $w_x$  and  $w_y$  based on  $1/e^2$ , and  $I_o$  is the maximum intensity.

Beam total power delivered at a spot with  $z$  vertical distance from the beam waist (estimated using thermopile measurements) is equal to the integration of the intensity over the laser spot in the horizontal plane (normal to the beam center axis), assuming complete absorption of the laser beam energy:

$$P = I_o \iint_{-\infty}^{\infty} e^{-2\left(\frac{x}{w_x}\right)^2} e^{-2\left(\frac{y}{w_y}\right)^2} dx dy \approx \frac{\pi}{2} I_o w_x w_y \quad (2)$$

where  $w_x$  and  $w_y$  are the  $(1/e^2)$  beam size.

This integration approximately gives the value of the maximum intensity:

$$I_o(z) \approx \frac{2P}{\pi w_x(z) w_y(z)} \quad (3)$$

where  $P$  is constant for different  $z$ 's, however the  $w_x$  and  $w_y$  change.

The Gaussian beam size at different  $z$  values is estimated using the following equations (assuming the beam spot major and minor axis is aligned with the lasing direction  $x$  and  $y$ ):

$$w_x(z) = w_{ox} \sqrt{1 + \left( \frac{M_x^2 \lambda z}{\pi w_{ox}^2} \right)^2} \quad (4)$$

$$w_y(z) = w_{oy} \sqrt{1 + \left( \frac{M_y^2 \lambda z}{\pi w_{oy}^2} \right)^2} \quad (5)$$

where  $M_x^2$  and  $M_y^2$  are the beam quality factor for the x and y direction respectively,  $w_{ox}$  and  $w_{oy}$  are the beam waist dimensions. These parameters are estimated using the knife edge method as described in the supplementary information.

The average flux  $I_{av}$  is estimated at a certain spot size for a laser power  $P$ , by averaging the intensity  $I(z)$  over the spot area  $A(z)$ :

$$\begin{aligned} I_{av}(z) &= \frac{\int_{-w_x(z)}^{w_x(z)} \int_{-w_y(z)}^{w_y(z)} I(x, y, z) dy dx}{A(z)} \\ &= \frac{I_o}{\pi w_x(z) w_y(z)} \int_{-w_x(z)}^{w_x(z)} \int_{-w_y(z)}^{w_y(z)} e^{-2\left(\frac{x}{w_x(z)}\right)^2} e^{-2\left(\frac{y}{w_y(z)}\right)^2} dx dy \end{aligned} \quad (6)$$

The average fluence  $F$  is then estimated using the following relationship:

$$F(z, v) = D(z, v) I_{av}(z) \quad (7)$$

where  $D(z, v)$  is the dwell time of the laser beam over a spot. The dwell time is estimated by dividing the beam length in the lasing direction  $x$  by the beam speed  $v$ . [6]

$$D(z, v) = \frac{2w_x(z)}{v} \quad (8)$$

## Supplementary Tables

**Table S1.** The experimental operating laser parameters of single paths at vertically fixed sample stage (Z-direction = distance of laser beam waist) and the corresponding accumulated fluences

| Operating Laser Power (%) | Calculated Laser Power (W) | Operating Raster Speed (%) | Calculated Raster Speed (mm s <sup>-1</sup> ) | Accumulated Laser Fluence (J cm <sup>-2</sup> ) |
|---------------------------|----------------------------|----------------------------|-----------------------------------------------|-------------------------------------------------|
| 30                        | 12.5                       | 1                          | 47                                            | 170                                             |
|                           |                            | 10                         | 153                                           | 52                                              |
|                           |                            | 20                         | 218                                           | 37                                              |
|                           |                            | 30                         | 269                                           | 30                                              |
|                           |                            | 40                         | 312                                           | 26                                              |
|                           |                            | 50                         | 350                                           | 23                                              |
|                           |                            | 60                         | 384                                           | 21                                              |
|                           |                            | 70                         | 412                                           | 19                                              |
|                           |                            | 80                         | 445                                           | 18                                              |
|                           |                            | 90                         | 468                                           | 17                                              |
|                           |                            | 100                        | 500                                           | 16                                              |
| 40                        | 18.3                       | 100                        | 500                                           | 23                                              |
| 50                        | 23.2                       |                            |                                               | 30                                              |
| 60                        | 28.1                       |                            |                                               | 36                                              |

**Table S2.** Summary of atomic percentage of the elements in pristine PI films and corresponding carbonized lines derived from different laser fluences

| Sample Code | Laser Fluence (J cm <sup>-2</sup> ) | Carbon (%) | Oxygen (%) | Nitrogen (%) | Fluorine (%) | Sulfur (%) |
|-------------|-------------------------------------|------------|------------|--------------|--------------|------------|
| N-LINC      | 0                                   | 74.7       | 18.6       | 6.5          | –            | –          |
|             | 16                                  | 82.3       | 11.2       | 6.3          | –            | –          |
|             | 21                                  | 81.2       | 13.0       | 5.8          | –            | –          |
|             | 30                                  | 83.4       | 12.8       | 3.9          | –            | –          |
|             | 52                                  | 83.6       | 12.8       | 3.5          | –            | –          |
|             | 170                                 | 88.5       | 7.6        | 3.9          | –            | –          |
| F-LINC      | 0                                   | 67.8       | 13.6       | 5.4          | 13.1         | –          |
|             | 16                                  | 76.3       | 10.9       | 5.3          | 7.6          | –          |
|             | 21                                  | 78.0       | 11.4       | 5.3          | 5.2          | –          |
|             | 30                                  | 82.2       | 11.1       | 3.6          | 3.1          | –          |
|             | 52                                  | 83.2       | 9.1        | 2.2          | 5.5          | –          |
|             | 170                                 | 94.6       | 3.4        | –            | 2.0          | –          |
| S-LINC      | 0                                   | 72.2       | 19.1       | 6.0          | –            | 2.7        |
|             | 16                                  | 81.4       | 12.0       | 5.0          | –            | 1.6        |
|             | 21                                  | 79.1       | 12.8       | 6.0          | –            | 2.1        |
|             | 30                                  | 81.3       | 13.6       | 3.7          | –            | 1.4        |
|             | 52                                  | 84.2       | 11.2       | 3.6          | –            | 1.1        |
|             | 170                                 | 89.5       | 9.6        | –            | –            | 1.0        |

**Table S3.** Summary of deconvolution of XPS C1s spectra in Figures S8–10

| Sample Code | Deconvolved peak             | Binding Energy (eV) |
|-------------|------------------------------|---------------------|
| PMDA-ODA    | C=C (sp <sup>2</sup> )       | 284.5               |
|             | C-C (sp <sup>3</sup> ) & C-N | 285.6               |
|             | C-O                          | 288.3               |
|             | O=C-O                        | 290.4               |
| N-LINC*     | C=C (sp <sup>2</sup> )       | 284.5               |
|             | C-C (sp <sup>3</sup> ) & C-N | 286.3               |
|             | C-O                          | 287.8               |
|             | O=C-O                        | 289.8               |
| F-LINC*     | C=C (sp <sup>2</sup> )       | 284.5               |
|             | C-C (sp <sup>3</sup> ) & C-N | 286.0               |
|             | C-O                          | 288.0               |
|             | O=C-O                        | 290.0               |
|             | C-F                          | 292.7               |
| S-LINC*     | C=C (sp <sup>2</sup> )       | 284.5               |
|             | C-C (sp <sup>3</sup> ) & C-N | 285.9               |
|             | C-S                          | 287.2               |
|             | C-O                          | 288.4               |
|             | O=C-O                        | 290.1               |

\* Samples were lased at fluence of 52 J cm<sup>-2</sup>

## References

- [1] K.H. Nam, H. Kim, H.K. Choi, H. Yeo, M. Goh, J. Yu, J.R. Hahn, H. Han, B.C. Ku, N.H. You, Thermomechanical and optical properties of molecularly controlled polyimides derived from ester derivatives, *Polymer (Guildf)*. 108 (2017) 502–512. <https://doi.org/10.1016/j.polymer.2016.11.062>.
- [2] H. Yeo, M. Goh, B.C. Ku, N.H. You, Synthesis and characterization of highly-fluorinated colorless polyimides derived from 4,4'-((perfluoro-[1,1'-biphenyl]-4,4'-diyl)bis(oxy))bis(2,6-dimethylaniline) and aromatic dianhydrides, *Polymer (Guildf)*. 76 (2015) 280–286. <https://doi.org/10.1016/j.polymer.2015.09.019>.
- [3] J.G. Liu, Y. Nakamura, Y. Shibasaki, S. Ando, M. Ueda, High refractive index polyimides derived from 2,7-bis(4-aminophenylenesulfanyl)thianthrene and aromatic dianhydrides, *Macromolecules*. 40 (2007) 4614–4620. <https://doi.org/10.1021/ma070706e>.
- [4] R. Poprawe, K. Boucke, D. Hoffman, *Tailored Light 1*, 2018. <https://doi.org/10.1007/978-3-642-01234-1>.
- [5] R. Poprawe, *Tailored Light 2 Laser Application Technology*, Springer, 2004.
- [6] J. Jiang, A.G. Jacobs, B. Wenning, C. Liedel, M.O. Thompson, C.K. Ober, Ultrafast Self-Assembly of Sub-10 nm Block Copolymer Nanostructures by Solvent-Free High-Temperature Laser Annealing, *ACS Appl. Mater. Interfaces*. 9 (2017) 31317–31324. <https://doi.org/10.1021/acsami.7b00774>.
